# Supplementary material for: A novel signaling transduction pathway of melatonin on lactose synthesis in cows via melatonin receptor 1 (MT1) and prolactin receptor (PRLR)
Source: PeerJ. 2023 Sep 4;11:e15932. doi: 10.7717/peerj.15932 (PMC10484205; doi:10.7717/peerj.15932)
Supplement: File S1 — Each data represents the results of a single individual. [file peerj-11-15932-s001.xlsx]

## Sheet: Sheet1
		control					2.5 mg/kg/d					5 mg/kg/d					10 mg/kg/d
lactose	0d	4.9	4.92	4.94	5.02	4.94	4.94	4.83	4.79	4.95	4.71	4.94	4.65	4.95	4.88	4.69	4.56	4.79	4.99	4.91	4.89
	7d	4.93	4.98	4.83	4.99	4.64	4.92	4.73	4.78	4.87	4.58	4.83	4.85	4.8	4.84	4.71	4.62	4.69	4.92	4.82	4.89
	14d	4.83		4.73	4.98	5.03	4.61	4.69	4.9	4.46	4.67	4.78	4.8	4.84	4.82	4.62	4.65	4.82	4.94	4.78	4.87
	21d	4.89	4.93	4.73	5.07	4.91	4.5	4.54	4.32	4.9	4.57	4.82	4.65	4.37	4.57	4.12	4.77	4.69	5.08	4.78	4.9
	28d	4.83	4.84	4.94	5.09	4.92	4.61	4.48	3.96	3.99	4.26	4.73	4.47	4.27	4.56	4.07	4.19	4.51	4.92	4.82	4.64
	35d	4.85	4.88	5.07	5.02	4.96	4.54	4.49	4.86	3.96	3.93	4.77	4.56	4.05	4.83	4.55	4.74	5.02	4.59	4.92	5.02
	42d	4.74	4.63	4.89	4.36	5.05	4.83	4.31	4.44	3.77	4.34	4.38	4.15	4.21	4.84	4.39	4.9	4.48	4.92	4.37	4.67
	49d	4.71	4.69	4.83	5	4.8	4.88	4.4	4.4	3.77	4.88	4.55	4.46	3.85	4.56	4.36	4.84	4.3	4.9	4.02	4.56
milk yield	0d	23	33	39	33	39	50	40	32	20	26	46	26	34	44	32	22	40	40	40	34
	7d	35.34	35.34	30.66	37.86	27.6	50.8	36.66	26	31.34	27.94	44.14	32	30	29.8	27.6	26.66	40.66	36.66	38	17.34
	14d	36	34.3	33.86	37.4	30	46	36	24	29.34	29.2	46.06	30.4	40	29	25.86	31	38	35	52	19
	21d	38.8	35.06	31.1	38.34	32	29.1	34.66	25.4	30.7	25.66	44.54	26.6	36.66	30.4	26	29.34	38.66	38.66	46.8	18
	28d	37.74	33.3	31.66	33.8	30	49.8	32.66	24	25.14	25.6	42.5	26.66	34	31.8	25.54	30.66	38	39.34	41.34	18.66
	35d	38	34.12	32.4	36.06	30	42.66	36	25.54	26.66	29.46	43.54	28.66	33.34	25.66	32.8	27	37.66	41	46.34	18.34
	42d	37.34	34.08	33.34	36.66	29	47.66	34	24.66	32	23.8	40.8	27.14	34	34	33.99	31	37.66	39.66	43	17.66
	49d	38.2	18	33	37.74	30	50.7	31	23	27.9	19.8	38.46	26.4	26	34.7	31.39	31	35	36.7	44	17
protein	0d	3.32	2.99	3.33	3.15	3.08	3.03	2.54	3.25	2.96	3.11	3.17	3.11	3.07	3.38	3.62	2.89	3.6	2.99	3.5	2.64
	7d	3.42	3.26	3.06	2.91	3.09	3.17	2.71	3.28	2.92	3.13	3.21	3.23	3.1	3.5	3.61	2.91	3.58	3.12	3.59	2.61
	14d	2.76	3.19	2.91	3.07	3.16	3.19	2.54	3.46	3.3	3.82	3.25	3.24	3.12	3.6	3.21	3.57	3.03	2.75	3.42	2.87
	21d	3.32	3.12	2.91	3.09	3.11	3.12	3.29	2.86	3.35	3.71	3.46	3.19	3.14	3.68	3.32	3.62	3.03	2.74	3.54	3.28
	28d	3.19	2.94	2.94	3.38	3.26	3.17	2.88	3.15	3.32		3.65	3.7	3.15	3.2	3.46	2.75	2.79	3.58	3.07	3.74
	35d	3.1	3.27	3.38	3.23	3.24	2.09	3.22	3.24	3.01	3.45	3.27	3.77	3.19	3.45	3.73	2.99	3.7	2.62	2.95	3.74
	42d	3.26	2.98	3.35	3.66	3.21	3.78	2.59	2.97	3.23	2.94	3.52	3.22	3.68	3.76	3.55	3.69	2.82	2.68	2.95	3.76
	49d	3.1	3.68	3.25	3.41	3.36	3.54	3.29	3.07	2.97	2.63	3.14	3.56	3.68	3.83	3.55	2.9	2.75	3.92	3.1	3.82
fat	0d	3.84	3.77	3.76	3.8	3.61	3.83	3.54	3.08	4.71	3.51	3.87	4.15	3.63	3.79	3.52	3.2	4.44	4.39	4.41	3.06
	7d	3.35	3.79	3.87	3.8	3.97	3.69	3.27	3.65	3.88	3.08	3.74	3.32	3.84	4.27	4.99	3.65	4.47	3.68	4.57	3.22
	14d	3.92	3.83	3.04	3.18	4.12	3.51	3.53	4.02	3.62	4.06	3.67	4.28	3.72	4.36	3.61	3.94	3.52	3.34	4.18	4.08
	21d	3.87	3.9	4.2	3.46	3.9	3.67	4.56	4.3	3.84	4.22	4.03	4.52	4.71	4.41	4.25	3.95	3.3	5.13	4.28	3.75
	28d	3.9	3.98	3.6	3.54	3.98	4.08	4.51	4.07	4.46	4.13	4.68	4.07	4.54	4.1	4.49	3.81	3.89	4.83	3.83	4.34
	35d	3.25	3.15	3.56	4.07	4.11	4.06	4.07	4.15	3.97	4.06	3.58	3.53	4.2	3.84	4.44	3.64	5.28	3.26	3.51	3.46
	42d	3.21	3.14	4.61	4.72	2.85	3.86	2.68	3.35	4	4.12	4.16	2.95	3.79	4.51	3.8	4.77	3.22	3.72	2.81	4.07
	49d	3.42	3.9	3.81	4.18	3.4	3.75	4.54	4.64	2.96	3.17	4.22	3.66	4.08	3.7	4.3	3.2	3.67	4.01	3.33	5.39
urea nitrogen	0d	11.88	11.46	10.22	10.97	11.56	10.52	10.02	11.28	12.39	11.43	10.59	10.61	10.15	10.52	10.74	10.41	12.51	11.32	12.24	9.91
	7d	11.48	11.65	11.61	11.4	9.49	11.43	10.85	11.78	11.53	10.95	11.89	11.43	11.82	12.74	13.63	11.32	12.96	11.35	13.02	10.42
	14d	12.72	11	11	11.46	11.54	10.64	10.14	12.53	12.07	13.27	11.8	12.28	11.72	12.92	11.84	12.41	11.09	10.79	12.22	11.7
	21d	11.65	11.4	11.29	11.14	11.37	11.19	12.03	11.96	11.61	13.48	12.36	12.31	12.23	12.46	12.36	12.58	10.98	12.36	12.4	11.93
	28d	10.91	10.85	10.94	11.74	11.08	11.12	11.74	11.07	11.31	11.31	12.36	12.1	11.94	12.06	11.91	10.65	10.83	13.21	10.4	13.99
	35d	11.11	11.27	11.78	12.3	11.1	9.51	11.15	11.29	11.81	11.95	11.62	11.89	11.25	11.89	14.31	11.58	13.63	10.81	10.94	12.15
	42d	11.7	11.35	12.82	13.44	11.15	12.39	10.52	9.84	11.39	11.9	12.47	11.4	11.03	13.85	12.19	12.48	10.87	15.9	11.03	13.19
	49d	11.23	12.28	12.04	11.48	11.76	11.84	11.69	12.23	10.92	10.82	11.91	11.86	13.74	12.06	12.39	10.19	10.79	13.01	11.38	13.86
