# Supplementary material for: A novel signaling transduction pathway of melatonin on lactose synthesis in cows via melatonin receptor 1 (MT1) and prolactin receptor (PRLR)
Source: PeerJ. 2023 Sep 4;11:e15932. doi: 10.7717/peerj.15932 (PMC10484205; doi:10.7717/peerj.15932)
Supplement: File S2 — Each data represents the results of a single individual. [file peerj-11-15932-s002.xlsx]

## Sheet: Sheet1
		control					2.5 mg/kg/d					5 mg/kg/d					10 mg/kg/d
melatonin in serum	0 d	4.41	3.88	2.7	2.35	2.09	3.13	6.3	2.08	4.01	3.26	3.1	4.94	3.42	2.01	3.06	3.02	5.31	4.09	2.31	6.06
	7d	4.57	3.13	2.07	2.06	4.09	3	3.01	4.1	4.16	4.12	4.1	6.08	7.19	3.09	9.19	3.06	9.97	6.23	13.03	7.05
	14d	6.09	2.5	4.59	3.48	3.08	9.15	7.1	8.5	7.09	4.04	8.46	5.1	7.1	5.01	6.09	4.1	5.06	9.35	15.1	8.27
	21d	3.06	4.78	3.04	6.02	4.23	6.06	8.15	7.1	8.46	7.44	5.05	5.03	7.1	4.07	6.4	7.08	6.02	20	9.17	12.26
	28d	6.71	3.75	2.59	2.09	3	3.1	7.66	7.89	5.35	9.95	9.6	11.6	9.06	5.4	5.21	7.64	7.7	8.55	9.45	8.62
	35d	3.64	4.48	5.84	4.05	4.5	4.27	7.59	10.1	1.91	4.71	6.8	5.82	7.64	6.64	8.52	4.84	3.65	5.26	2.92	4.16
	42d	6.12	3.31	2.06	2.32	4.48	4.22	4.64	2.55	2.12	1.57	1.27	7.65	0.31	4.3	7.97	3.2	2.87	3.4	3.25	3.13
	49d	4.89	0.37	4.29	7.82	2.48	6.39	3.01	3.09	4.37	4.21	2.7	4.18	5.85	4.19	0.81	3.31	4.52	4.62	5.62	4.52
melatonin in milk	0 d	33.64	3.02	55.66	7.67	3.98	30.33	1.84	22.75	5.3	1.07	2.74	3.43	1.94	1.77	7.62	2.73	2.43	3.57	8.52	2.28
	7d	9.95	67.37	75.85	31.67	41.77	1.66	4.35	37.09	82.46	33.95	10.63	14.01	47.91	5.3	2.71	21.61	37.09	64.98	0.1	3.33
	14d	7.89	1.16	2.62	9.62	1.15	13.55	0.49	18.88	2.69	1.49	6.2	2.84	4.08	3.34	4.09	42.72	6.75	7.35	2.51	36.33
	21d	38.28	22.08	5.99	2.59	17.23	5.29	1.53	3.16	0.62	2.66	3.01	38.87	8.77	2.45	4.86	5.29	45.78	2.24	1.32	2.63
	28d	74.32	37.97	14.37	2.88	37.63	64.66	12.19	2.62	11.87	7.84	31.95	2.86	9.5	9.79	11.61	40.69	7.39	73.93	37.69	1.47
	35d	22.7	16.92	1.28	0.32	21.17	9.87	6.72	4.97	14.83	4.54	14.48	51.7	7.78	9.28	3.16	2.76	22.39	49.31	4.15	60.2
	42d	8.18	6.25	1.28	6.6	17.7	2.16	4.87	1.79	7.66	6.06	8.73	9.57	30.36	4.51	2.62	3.19	45.37	19.02	2.4	7.58
	49d	40.6	78.18	8.02	62.38	57.46	6.75	64	0.05	0.13	6.38	5.46	8.08	59.65	49.91	1.71	8.45	46.61	6.21	39.79	136.06
NEFA	0 d	0.17	0.13	0.12	0.13	0.16	0.14	0.17	0.12	0.16	0.13	0.1	0.14	0.14	0.13	0.13	0.14	0.13	0.16	0.28	0.18
	28 d	0.15	0.13	0.1	0.1	0.14	0.13	0.11	0.13	0.11	0.11	0.08	0.11	0.09	0.09	0.12	0.12	0.11	0.1	0.2	0.15
changes%		-13.06	0	-16.67	-23.08	-12.5	-7.14	-35.29	8.33	-31.25	-16.34	-23.9	-21.43	-35.71	-30.77	-7.69	-14.29	-15.38	-37.5	-30.29	-14.56
GLU	0 d	3	2.98	2.83	3	2.89	3.23	3.07	4.84	2.73	2.97	2.82	3.38	3.01	2.5	2.85	3.13	2.91	2.84	2.45	3.01
	28 d	3.68	3.42	3.62	3.8	3.51	3.6	3.67	4.74	4.14	3.79	3.64	3.67	3.53	3.71	3.62	3.59	3.87	3.6	3.77	3.89
changes%		22.7	14.77	27.92	26.67	21.45	11.46	19.54	-2.07	51.65	27.61	29.08	8.58	17.28	48.4	27.02	14.7	32.99	26.76	53.88	29.24
