# Supplementary material for: A novel signaling transduction pathway of melatonin on lactose synthesis in cows via melatonin receptor 1 (MT1) and prolactin receptor (PRLR)
Source: PeerJ. 2023 Sep 4;11:e15932. doi: 10.7717/peerj.15932 (PMC10484205; doi:10.7717/peerj.15932)
Supplement: File S3 [file peerj-11-15932-s003.xlsx]

## Sheet: Sheet1
		control					2.5 mg/kg/d					5 mg/kg/d					10 mg/kg/d
PRL	0 d	125.53	77.7	51.98	89.69	41.61	133.97	63.99	61.1	88.21	107.28	178.1	54.94	58.41	91.04	114.73	137.91	88.61	38.44	49.95	39.24
	28 d	125.58	80.68	65.36	95.45	80.16	72.89	40.17	53.25	70.36	65.63	137	43.29	55.75	59.95	77.55	93.7	60.8	49.24	50.03	40.37
	changes%	0.04	3.85	25.74	6.43	92.66	-45.59	-37.23	-12.84	-20.24	-38.82	-23.08	-21.21	-4.55	-34.15	-32.4	-32.06	-31.39	28.07	0.16	2.88
P	0 d	0.29	0.44	0.43	0.27	0.48	0.6	0.15	0.35	0.45	0.32	0.41	0.12	0.38	0.28	0.36	0.23	0.36	0.66	0.14	0.32
	28 d	0.3	0.35	0.34	0.22	0.36	0.84	0.22	0.53	0.59	0.28	0.41	0.17	0.33	0.18	0.19	0.36	0.24	0.41	0.1	0.36
	changes%	4.5	-22.12	-21.16	-18.73	-24.06	40.6	44	53.62	31.69	-10.73	-0.98	43.97	-14.17	-34.41	-47.5	55.13	-33.61	-38.33	-29.17	13.44
INS	0 d	16.59	20.12	15.9	14.51	12.57	27.15	21.87	19.32	19.1	17.72	17.44	25.02	25.76	39.77	15.19	27.39	29.91	19.7	17.43	27.32
	28 d	18.13	20.95	17.94	17.98	12.11	22.44	20.24	22.63	38.13	27.03	26.5	36.77	22.91	34.23	25.42	20.76	16.37	31.83	18.54	31.84
	changes%	9.31	4.14	12.85	23.91	-3.66	-17.34	-7.44	17.16	99.69	52.55	51.98	46.97	-11.06	-13.93	67.35	-24.19	-45.28	61.61	6.4	16.56
GH	0 d	0.99	0.6	1.39	1.26	1.39	1.21	0.69	1.22	0.59	0.92	1.39	0.69	0.62	0.82	0.92	1.46	1.22	0.78	0.9	1.14
	28 d	0.75	1.08	0.87	1.52	0.84	0.74	0.71	0.97	0.68	0.83	1.91	0.84	0.82	1.19	0.99	0.86	1.3	1.08	1.06	1.93
	changes%	-24.54	78.15	-37.04	20.57	-39.64	-38.49	3.36	-20.15	15.53	-9.94	36.66	20.59	33.66	45.26	6.83	-41.29	6.54	37.85	18.05	69.12
