# Supplementary material for: A novel signaling transduction pathway of melatonin on lactose synthesis in cows via melatonin receptor 1 (MT1) and prolactin receptor (PRLR)
Source: PeerJ. 2023 Sep 4;11:e15932. doi: 10.7717/peerj.15932 (PMC10484205; doi:10.7717/peerj.15932)
Supplement: File S4 — Each data represents the results of a single individual. [file peerj-11-15932-s004.xlsx]

## Sheet: Sheet1
	control					melatonin
lactose	2.15	2.18	2.07	1.92	1.81	1.41	1.57	1.81	1.41	1.55
	control	control	control	melatonin	melatonin	melatonin
GLUT1	25.41	25.44	25.27	26.1	26.08	25.93
PRLR	32.84	32.7	33.49	34.46	33.87	33.92
SLC35A2	31.32	31.64	31.51	32.25	32.05	32.27
SLC35B1	26.05	26.07	25.88	26.94	26.86	27.13
LALBA	29.21	29.24	29.07	28.28	28.38	28.27
B4GALT	25.5	25.61	25.79	26.23	26.31	26.16
ACTB	21.09	20.95	20.32	21.38	20.61	22.02
