# Supplementary material for: A novel signaling transduction pathway of melatonin on lactose synthesis in cows via melatonin receptor 1 (MT1) and prolactin receptor (PRLR)
Source: PeerJ. 2023 Sep 4;11:e15932. doi: 10.7717/peerj.15932 (PMC10484205; doi:10.7717/peerj.15932)
Supplement: File S5 [file peerj-11-15932-s005.xlsx]

## Sheet: Sheet1
	ACTB	PRLR	SL35B1	LALBA
control	21.57	33.56	27	29.97
	21.63	33.71	26.76	29.82
	21.97	34.27	26.85	30.27
melatonin	22.04	35.09	27.76	28.91
	22.01	34.5	27.5	29.02
	21.84	34.55	27.69	29.12
luzindole	21.45	34.24	27.21	29.8
	21.99	33.87	26.81	29.64
	22.01	33.92	26.86	30.33
luzindole+melatonin	21.76	33.35	26.87	28.51
	21.43	33.76	26.64	28.74
	21.25	33.56	26.74	28.39
4-P-PDOT	21.73	33.36	26.91	29.65
	21.58	34.27	26.55	29.76
	21.47	33.74	26.77	29.36
4-P-PDOT+melatonin	21.06	33.43	27.18	28.26
	21.33	33.69	26.92	28.56
	21.53	33.51	27.09	28.37
